# Supplementary material for: Misconception of reductive elimination of H2, in the context of the mechanism of nitrogenase
Source: Royal Society of Chemistry journal article supplement (doi:10.1039/c5dt00771b), 2015-01-01
Supplement: c5dt00771b1.pdf [file c5dt00771b1.pdf]

## **Misconception of reductive elimination of H<sub>2</sub>, in the context of the mechanism of nitrogenase**

Ian Dance

School of Chemistry, University of New South Wales, Sydney 2052, Australia.

[i.dance@unsw.edu.au](mailto:i.dance@unsw.edu.au)

### **Electronic supplementary information**

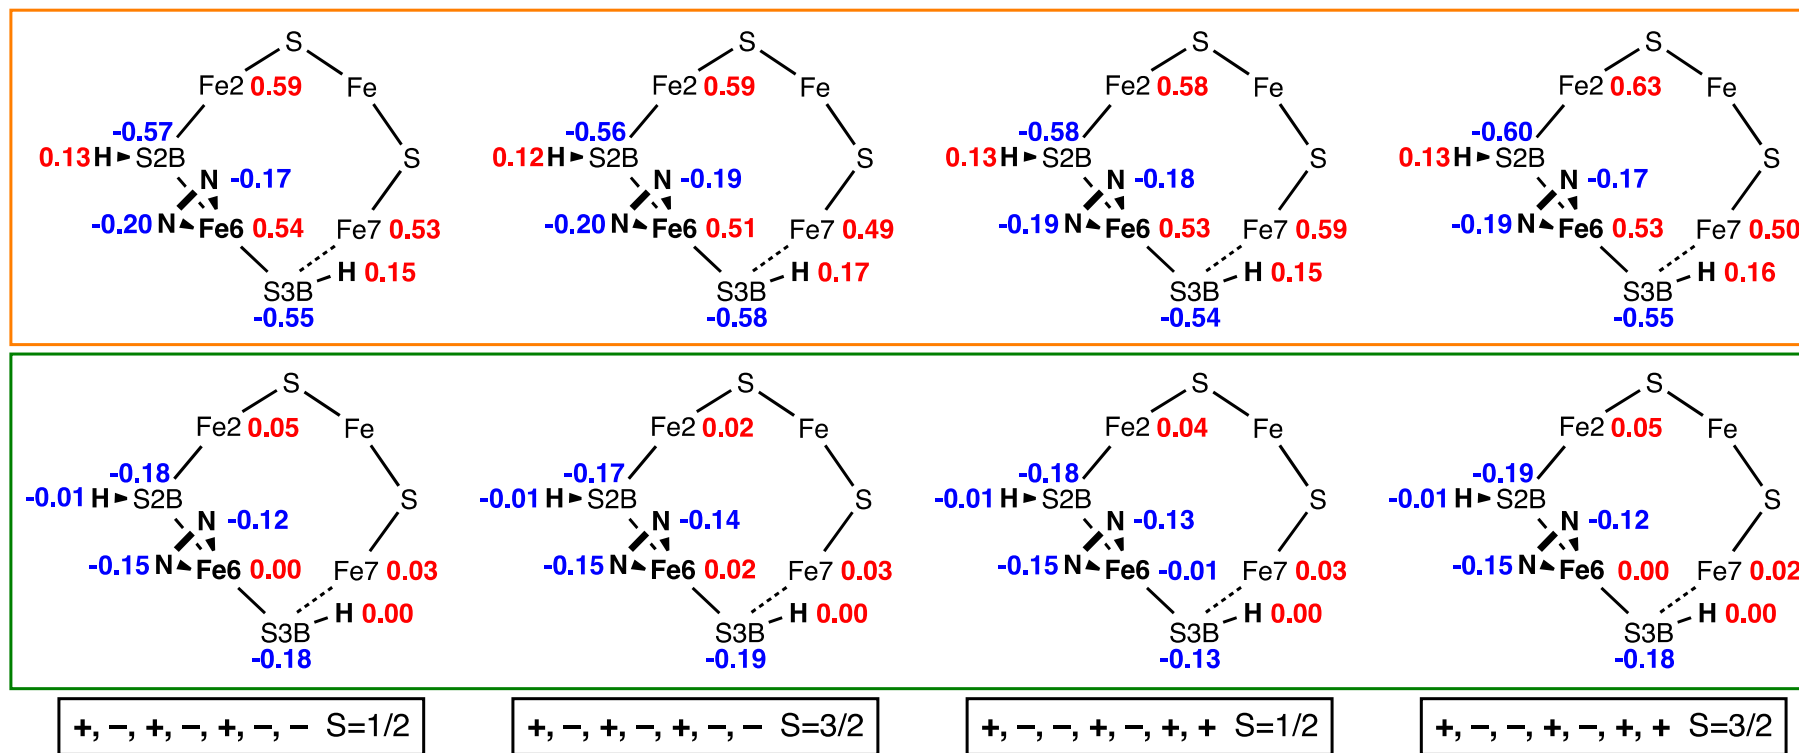

Fig S1. Calculated charges (Mulliken, orange box; Hirshfeld green box; red positive; blue negative) for the same structure in two electronic states and two net spin  $S$  states. The boxed labels list the signs of the spin densities on Fe atoms Fe1 - Fe7.

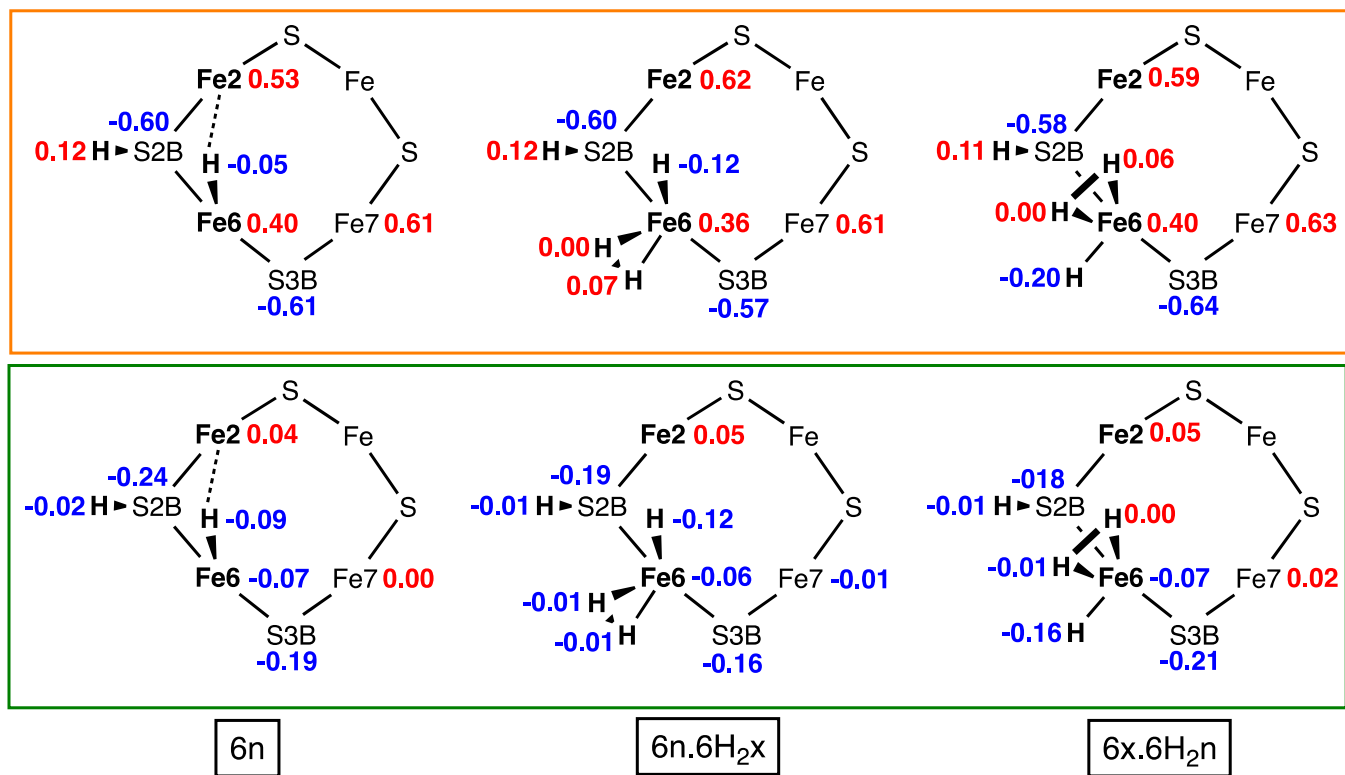

Fig. S2. Calculated charges (Mulliken, orange box; Hirshfeld green box; red positive; blue negative) for models without H on S<sub>3</sub>B.

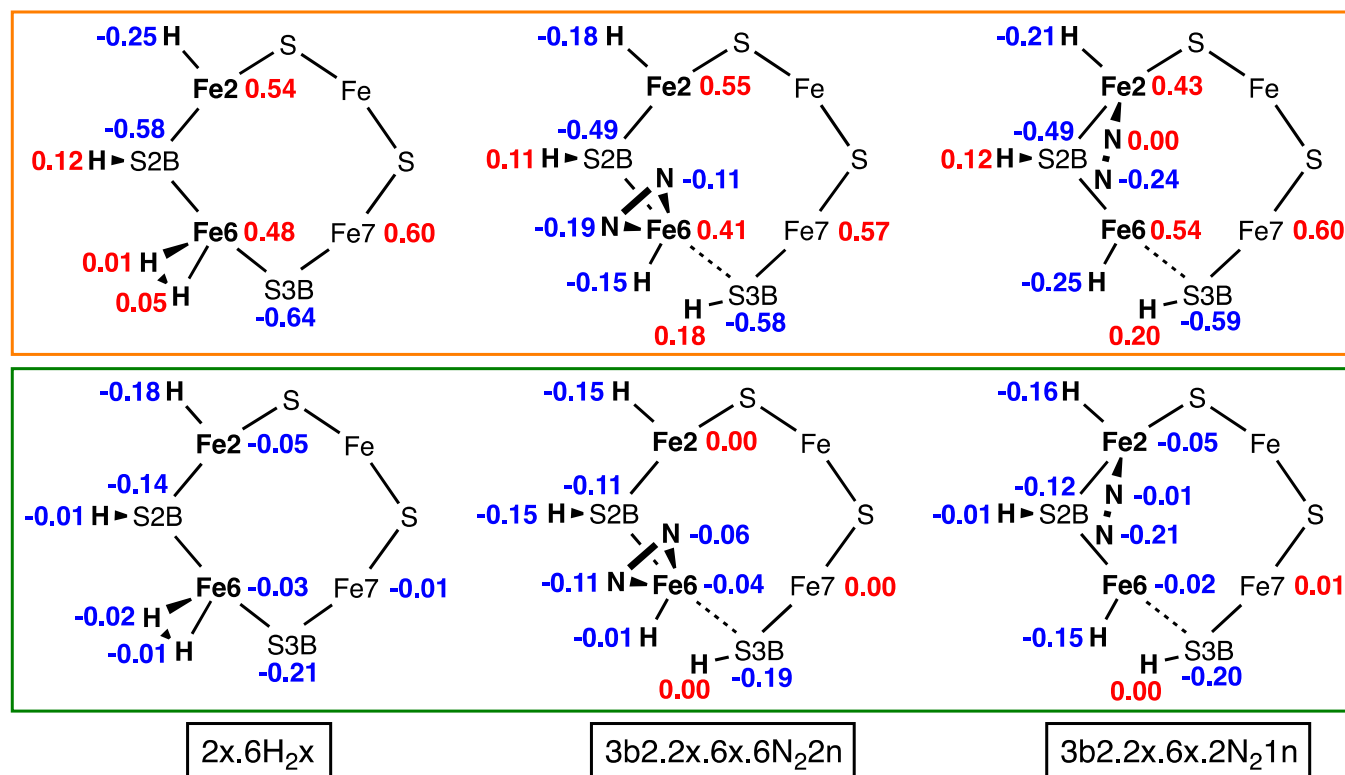

Fig. S3. Calculated charges (Mulliken, orange box; Hirshfeld green box; red positive; blue negative) for models with *exo* H on Fe2.
